1

2 SARS-CoV-2 utilizes a multipronged strategy to suppress host  
3 protein synthesis

4 Yaara Finkel<sup>1,5</sup>, Avi Gluck<sup>1,5</sup>, Roni Winkler<sup>1,5</sup>, Aharon Nachshon<sup>1</sup>, Orel Mizrahi<sup>1</sup>, Yoav  
5 Lubelsky<sup>2</sup>, Binyamin Zuckerman<sup>2</sup>, Boris Slobodin<sup>3</sup>, Yfat Yahalom-Ronen<sup>4</sup>, Hadas Tamir<sup>4</sup>, Igor  
6 Ulitsky<sup>2</sup>, Tomer Israely<sup>4</sup>, Nir Paran<sup>4</sup>, Michal Schwartz<sup>1\*</sup> and Noam Stern-Ginossar<sup>1\*</sup>

7

8 <sup>1</sup> Department of Molecular Genetics, Weizmann Institute of Science, Rehovot 76100, Israel.

9 <sup>2</sup> Department of Biological Regulation, Weizmann Institute of Science, Rehovot 76100, Israel

10 <sup>3</sup> Department of Biomolecular Sciences, The Weizmann Institute of Science, Rehovot, Israel

11 <sup>4</sup> Department of Infectious Diseases, Israel Institute for Biological Research, Ness Ziona 74100,  
12 Israel.

13 <sup>5</sup> These authors contributed equally to this work

14 \* To whom correspondence should be addressed: [michalsc@weizmann.ac.il](mailto:michalsc@weizmann.ac.il)

15 or [noam.stern-ginossar@weizmann.ac.il](mailto:noam.stern-ginossar@weizmann.ac.il)

16

17

18 **Abstract:**

19 Severe acute respiratory syndrome coronavirus 2 (SARS-CoV-2) is the cause of the ongoing  
20 coronavirus disease 19 (COVID-19) pandemic. Despite the urgent need, we still do not fully  
21 understand the molecular basis of SARS-CoV-2 pathogenesis and its ability to antagonize innate  
22 immune responses. Here, we use RNA-sequencing and ribosome profiling along SARS-CoV-2  
23 infection and comprehensively define the mechanisms that are utilized by SARS-CoV-2 to  
24 shutoff cellular protein synthesis. We show SARS-CoV-2 infection leads to a global reduction in  
25 translation but that viral transcripts are not preferentially translated. Instead, we reveal that  
26 infection leads to accelerated degradation of cytosolic cellular mRNAs which facilitates viral  
27 takeover of the mRNA pool in infected cells. Moreover, we show that the translation of  
28 transcripts whose expression is induced in response to infection, including innate immune genes,  
29 is impaired, implying infection prevents newly transcribed cellular mRNAs from accessing the  
30 ribosomes. Overall, our results uncover the multipronged strategy employed by SARS-CoV-2 to  
31 commandeer the translation machinery and to suppress host defenses.

32

### 33 **Introduction:**

34 Severe acute respiratory syndrome coronavirus 2 (SARS-CoV-2) is the cause of the ongoing  
35 coronavirus disease 19 (COVID-19) pandemic <sup>1,2</sup>. SARS-CoV-2 is an enveloped virus consisting  
36 of a positive-sense, single-stranded RNA genome of ~30 kb. From the positive strand genomic  
37 RNA, two overlapping open reading frames (ORFs) are translated, ORF1a (pp1a) and ORF1b  
38 (pp1ab). The translation of ORF1b is mediated by a -1 frameshift that allows translation to  
39 continue beyond the stop codon of ORF1a. These generate continuous polypeptides which are  
40 cleaved into a total of 16 nonstructural proteins (NSP 1-16, Snijder et al., 2016; Sola et al., 2015;  
41 Stadler et al., 2003; V'kovski et al., 2020). Among them are the subunits that constitute the  
42 RNA-dependent RNA polymerase (RdRP), which in turn transcribes subgenomic RNAs that  
43 contain a common 5' leader fused to different segments from the 3' end of the viral genome <sup>3-5</sup>.  
44 The different subgenomic RNAs encode 4 conserved structural proteins- spike protein (S),  
45 envelope protein (E), membrane protein (M), nucleocapsid protein (N)- and several accessory  
46 proteins and non-canonical protein products <sup>7-9</sup>.

47 Translation of viral proteins relies solely on the cellular translation machinery; therefore, viruses  
48 must commandeer this machinery to translate their own mRNAs. In addition, viruses need to  
49 counteract the antiviral response cells mount upon infection <sup>10</sup>. The first line of defense applied  
50 by infected cells engages the interferon (IFN) pathway, which amplifies signals resulting from  
51 detection of intracellular viral components to induce a systemic anti-viral response. Specifically,  
52 cells contain various sensors that detect the presence of viral RNAs and promote nuclear  
53 translocation of transcription factors, leading to transcription and secretion of type I IFNs <sup>11</sup>.  
54 Binding of IFN to its cognate receptor in autocrine and paracrine manners leads to the  
55 propagation of the signal and to the transcription and translation of hundreds of interferon  
56 stimulated genes that act to hamper viral replication at various stages of the viral life cycle <sup>12</sup>. In  
57 the case of SARS-CoV-2, interferon response seems to play a critical role in pathogenesis <sup>13-17</sup>.  
58 In addition, the extent to which SARS-CoV-2 suppresses the IFN response is a key characteristic  
59 that distinguishes it from other respiratory viruses <sup>18,19</sup>.

60 Viruses utilize various strategies to cause shutoff of host mRNA translation <sup>10</sup>, including  
61 hampering mRNA processing steps and export, inducing degradation of mRNAs and inhibiting

62 translation. Coronaviruses (CoVs) are known to cause host shutoff<sup>10,20</sup> and several strategies  
63 have been proposed for how the beta CoVs may shut-off host protein synthesis and evade  
64 immune detection. These include degradation of host mRNA in the nucleus or the cytosol and  
65 inhibition of host translation<sup>21,22</sup>. Nonetheless, the extent to which SARS-CoV-2 uses these or  
66 other strategies remains unclear.

67 NSP1 is the best characterized and most prominent coronavirus host shutoff factor<sup>23</sup>. Several  
68 recent studies showed SARS-CoV-2 NSP1 binds the 40s ribosome and inhibits translation<sup>24-28</sup>.  
69 In addition, other SARS-CoV-2 proteins were shown to interfere with cellular gene expression.  
70 For example, one of the SARS-CoV-2 accessory proteins, ORF6, was suggested to disrupt  
71 nucleocytoplasmic transport leading to inhibition of gene expression<sup>29</sup> and several viral proteins  
72 have been demonstrated to antagonize IFN-I production and signaling<sup>24,30</sup>. Although, different  
73 SARS-CoV-2 proteins are implicated in host expression shutoff, a comprehensive picture of the  
74 effect of SARS-CoV-2 infection on cellular gene expression is still lacking.

75 Here we employ RNA-sequencing and ribosome profiling along SARS-CoV-2 infection to  
76 explore the mechanisms which the virus utilizes to interfere with host protein synthesis. We  
77 reveal SARS-CoV-2 uses a multi-faceted approach to shutoff cellular protein production. SARS-  
78 CoV-2 infection induces global translation inhibition but surprisingly the translation of viral  
79 transcripts is not preferred over their cellular counterparts. Instead we reveal that infection leads  
80 to accelerated cellular mRNAs degradation, likely conferred by NSP1. Viral transcripts are  
81 refractory to these effects, an evasion potentiated by their 5'UTRs, enabling viral dominance  
82 over the mRNA pool in infected cell. Finally, we show that the translation of transcripts whose  
83 expression is induced in response to infection, including innate immune genes, is severely  
84 impaired. Overall these findings reveal the key mechanisms SARS-CoV-2 is applying to  
85 suppress cellular protein synthesis and host defenses.

86

## 87 **Results:**

### 88 **Simultaneous monitoring of RNA levels and translation during SARS-CoV-2 infection**

89 To gain a detailed view of the changes that occur in viral and host translation over the course of  
90 SARS-CoV-2 infection, we infected Calu3 cells with SARS-CoV-2 at multiplicity of infection  
91 (MOI) of 3 and harvested infected cells at 3, 5, and 8 hours post infection (hpi) as well as  
92 uninfected cells. This high MOI infection results in infection of the majority of the cells and thus  
93 a synchronous cell population, allowing for molecular dissection of the events along infection.  
94 We designed our experiment to simultaneously monitor both RNA levels and translation (Figure  
95 1A). Deep sequencing of mRNA (RNA-seq) generates a detailed depiction of transcript levels  
96 during infection and this was paired with ribosome profiling, which allows accurate  
97 measurement of protein synthesis by capturing the overall *in-vivo* distribution of ribosomes on a  
98 given message<sup>31,32</sup>. In order to assess the reproducibility of our experiments we prepared two  
99 independent biological replicates for the uninfected and 8hpi time points and both the mRNA  
100 and footprint measurements were reproducible (Figure S1A and S1B). Metagene analysis, in  
101 which gene profiles are aligned and then averaged, revealed the expected profiles of footprints  
102 along mRNAs; ribosome density accumulates from the start codon along the gene body ending at  
103 the first in-frame stop codon with pronounced accumulation of ribosomes at the initiation sites  
104 and 3 bp periodicity along the gene body (Figure S1C). Using this data, we quantitatively  
105 assessed the expression pattern of 8627 cellular transcripts and 12 canonical viral ORFs that are  
106 expressed from the genomic and sub-genomic RNAs along SARS-CoV-2 infection.

107 Analysis of the mRNAs and footprints originating from cellular and viral transcripts illustrates  
108 SARS-CoV-2's unprecedented dominance over the mRNA pool. At 8 hpi viral mRNAs comprise  
109 almost 90% of the mRNAs in infected cells (Figure 1B). Surprisingly, however, at the same time  
110 point, viral mRNAs account for only ~34% of the RNA fragments engaged with ribosomes in the  
111 cells (Figure 1C). In order to quantitatively evaluate the ability of SARS-CoV-2 to co-opt the  
112 host ribosomes we calculated the relative translation efficiency (TE) of viral and cellular RNA  
113 along infection. TE is defined as the ratio of footprints to mRNA reads for a given gene and  
114 reflects how well a gene is being translated. We then compared the TE of human genes to that of  
115 viral genes at each of the time points along infection. The analysis shows that at 3 hpi viral gene

116 translation efficiencies fall within the general range of cellular gene translation. This indicates  
117 that when infection initiates, viral transcripts are translated with efficiencies similar to those of  
118 host transcripts. As infection progresses, viral gene translation efficiency relative to cellular  
119 genes is significantly reduced (Figure 1D). Since it seems improbable that the virus will promote  
120 conditions that are unfavorable to the translation of its mRNA, this relative reduction in  
121 translation of viral genes at 5 and 8 hpi may indicate that not all viral RNAs are accessible for  
122 translation. Since double-membrane sealed replication compartments are formed to  
123 accommodate viral genome replication<sup>33</sup>, an appealing possibility is that these compartments  
124 sequester a sizable fraction of the viral RNA molecules and thus prevent them from being a part  
125 of the translated mRNA pool.

126 By their nature, deep sequencing measurements provide relative values but not absolute  
127 quantification of RNA and translation levels. Since SARS-CoV-2 encoded protein, NSP1, was  
128 recently shown to interfere with translation by blocking the mRNA entry channel of ribosomes  
129<sup>25-28</sup>, and since the extent to which SARS-CoV-2 interferes with the overall levels of cellular  
130 mRNA was not assessed, we next examined if SARS-CoV-2 infection affects global translation  
131 and RNA levels. To quantify absolute translation levels, we measured nascent protein synthesis  
132 levels using an analogue of puromycin, O-Propargyl Puromycin (OPP), which incorporates into  
133 elongating polypeptide chains<sup>34</sup>. The nascent polypeptides with incorporated OPP are  
134 fluorescently-labeled via a Click reaction and the levels of OPP incorporation into elongating  
135 polypeptides is quantified by flow cytometry (Figure S2A and S2B). We infected Calu3 cells  
136 with SARS-CoV-2 at an MOI of 3 and measured nascent protein synthesis levels in uninfected  
137 cells and at 3, 5 and 8 hpi. We observed a significant reduction in global translation levels  
138 already at 3 hpi which was augmented with time, and at 8 hpi translation activity was reduced by  
139 50% (Figure 1E). In parallel we measured the total RNA levels and rRNA levels extracted from  
140 uninfected cells and at 3, 5, and 8 hpi. This analysis illustrated there are no major changes in  
141 total RNA or in rRNA levels along SARS-CoV-2 infection (Figure S3A and S3B). Since the vast  
142 majority of RNA in cells originates from rRNA and this dominance of rRNA may mask changes  
143 in mRNA levels we sequenced total RNA, without rRNA depletion, to assess the relative  
144 abundance of cellular and viral mRNAs in uninfected cells and at 3, 5, and 8 hpi. This analysis  
145 demonstrates that the pool of mRNA molecules relative to rRNA is growing during infection,

146 due to the massive production of viral transcripts but at the same time the relative fraction of  
147 cellular mRNA is reduced by approximately 2-fold (Figure 1F). This suggests that during  
148 infection there is both massive production of viral transcripts and a concomitant substantial  
149 reduction in the levels of cellular transcripts.

150 Next, we quantitatively assessed the expression pattern of cellular genes along SARS-CoV-2  
151 infection. We clustered the mRNA levels of genes that showed the most significant changes  
152 along infection using partitioning clustering, allowing grouping of cellular transcripts into three  
153 distinct classes based on similarities in temporal expression profiles in the RNA-seq. Overall, we  
154 found that changes in ribosome footprints tracked the changes in transcript abundance (Figure  
155 1G), with some exceptions that will be discussed in detail below. This shows that part of the  
156 reduction in cellular protein synthesis is driven by the reduction in cellular RNA levels.  
157 Interestingly, although the levels of the majority of host transcripts were reduced during SARS-  
158 CoV-2 infection, we identified numerous transcripts that were significantly elevated (Figure 1G,  
159 cluster 3). We carried out pathway enrichment analysis for each of these three clusters. As  
160 expected, the group of upregulated mRNAs (cluster 3) was significantly enriched with genes  
161 related to immune response, including Toll receptor Signaling, chemokine and cytokine  
162 signaling (Figure 1H and Table S1) and these upregulated genes include IL6 and IL8 which play  
163 a significant role in the pathogenesis of SARS-CoV-2<sup>35</sup> and several IFN stimulated genes like,  
164 IFIT1, 2 and 3, IRF1, ISG15 and TNF alpha induced proteins. These measurements and  
165 analyses reveal that the shutoff in host protein synthesis is driven by several mechanisms  
166 including; general reduction in the translation capacity of infected cells and reduction in the  
167 levels of most cellular mRNAs.

168

### 169 **Viral gene expression dynamics along infection**

170 We next analyzed viral gene expression dynamics along SARS-CoV-2 infection. Viral ORFs are  
171 translated from the 30kb genomic RNA or from a nested series of subgenomic RNAs that  
172 contain a common 5' leader fused to different segments from the 3' end of the viral genome  
173 (Figure 2A and V'kovski et al., 2020). Viral transcripts and translation levels significantly

174 increased from 3 to 5 hpi but the relative abundance of some viral transcripts and their translation  
175 rates were reduced from 5 to 8 hpi (Figure 2B and 2C). This relative reduction in translation rates  
176 of some viral transcripts prompted us to assess the relative translation efficiency of viral genes  
177 along infection. Since, as indicated above, the translation efficiency of viral genes compared to  
178 their cellular counterparts is relatively reduced along infection (Figure 1D), here we examined  
179 how the translation of viral genes is distributed between different viral transcripts at different  
180 times post infection. This focused analysis revealed an interesting connection between changes  
181 in translation efficiency of viral ORFs and their relative location on the viral genome. ORFs that  
182 are located at the 5' end of the genome showed relative increase in their translation efficiency  
183 along infection whereas ORFs that are encoded towards the 3' end of the genome showed  
184 relative reduction in their translation efficiencies and ORFs located in the middle of genome  
185 showed no major changes in their relative translation efficiency (Figure 2D). Since all viral  
186 subgenomic RNAs share the same 5'UTR these differences in translation capacity according to  
187 the location in the genome point to a potential unappreciated role for the 3'UTR (the 3' portion  
188 of which is shared between all transcripts) or for the length of viral transcripts, which varies  
189 greatly between viral transcripts (Figure 2A). To examine if this phenomenon reflects a general  
190 beta CoVs feature, we analyzed the expression and translation of Mouse Hepatitis Virus strain  
191 A59 (MHV) ORFs along MHV infection using published RNA-seq and ribosome profiling data  
192 along MHV infection<sup>36</sup>. MHV has a similar genomic organization (Figure 2E) and the increase  
193 in viral mRNA and translation between 5 and 8 hpi varied between viral ORFs (Figure 2F and  
194 2G). Although this phenomenon was not as strong, also in the case of MHV, ORFs that are  
195 located at the 5' end of the genome showed relative increase or no change in their translation  
196 efficiency along infection whereas ORFs that are encoded towards the 3' end of the genome  
197 showed relative reduction in their translation efficiency (Figure 2H). Together these results  
198 indicate that the 3'UTR or viral gene length are likely regulating the translation efficacy of viral  
199 mRNAs along infection.

200 Most SARS-CoV-2 ORFs are 3'-proximal and translated from dedicated subgenomic mRNA  
201 (Figure 2A). However several subgenomic RNAs encode for additional out-of-frame ORFs,  
202 likely via a leaky scanning mechanism<sup>9,37-39</sup>. These include ORFs 7b and ORF9b, which are  
203 translated from the ORF7a and N subgenomic RNAs, and two ORFs we recently identified by



204 ribosome profiling<sup>9</sup>, that are supported by additional evidence<sup>37,39</sup>, ORF3c and ORFS.iORF  
205 that are translated from ORF3a and ORF-S subgenomic RNAs. Since scanning efficiency can be  
206 regulated by stress conditions<sup>40</sup> we examined if the ratio between the translation of a 3'-proximal  
207 ORF and its corresponding out-of-frame ORF (encoded by the same subgenomic RNA) changes  
208 during infection. Since ORF9b expression was low in our measurements it was excluded from  
209 this analysis. The translation of ORF7b, ORF3c and ORFS.iORF correlated with the expression  
210 of the 3'-proximal main ORF, indicating there are no major changes in the efficiency of ribosome  
211 scanning of viral transcripts along infection (Figure 2I).

212

### 213 **Cellular mRNAs are degraded during SARS-CoV-2 infection**

214 Our results indicate that the levels of the majority of cellular RNA are reduced during SARS-  
215 CoV-2 infection and this reduction contributes to the shutoff of cellular protein synthesis.  
216 Reduction in cellular RNA levels could be due to interference with RNA production or  
217 accelerated RNA degradation. To explore the molecular mechanism, we analyzed if the  
218 reduction in cellular transcripts is associated with their subcellular localization. We used  
219 measurements of the subcellular localization of transcripts by cytoplasmic and nuclear  
220 fractionation<sup>41</sup> to assess the importance of subcellular localization. The levels of transcripts that  
221 mostly localize to the cytoplasm were more reduced in infected cells compared to transcripts that  
222 are mostly nuclear (Figure 3A) and there was a clear correlation between subcellular localization  
223 and the extent of reduction in transcript levels following SARS-CoV-2 infection (Figure S4A).  
224 Furthermore, compared to transcripts encoded in the nuclear genome, mitochondrial encoded  
225 transcripts were refractory to the effects of SARS-CoV-2 infection (Figure 3B). The specific  
226 sensitivity of cytosolic transcripts implies these transcripts may be specifically targeted during  
227 SARS-CoV-2 infection. In CoVs, the most prominent and well characterized cellular shutoff  
228 protein is NSP1<sup>23</sup>. So far, studies on SARS-CoV-2 NSP1 demonstrated it restricts translation by  
229 directly binding to the ribosome 40S subunit<sup>25-28</sup>, thereby globally inhibiting translation  
230 initiation. For SARS-CoV, on top of this translation effect, NSP1 interactions with the 40S was  
231 also shown to induce cleavage of translated cellular mRNAs, thereby accelerating their turnover  
232<sup>21</sup>. To examine if the reduction in cellular transcripts in SARS-CoV-2 infected cells is coupled to

233 their translation we compiled a list of 14 long non-coding RNAs (lncRNAs) that localize to the  
234 cytoplasm and are well expressed in our data but, as expected, poorly translated (Figure S4B).  
235 Relatively to cellular mRNAs, cytoplasmic lncRNAs were less affected by SARS-CoV-2  
236 infection (Figure 3C), indicating accelerated turnover of cellular transcripts in infected cells may  
237 be related to their translation. Recently, ribosome profiling and RNA-seq were conducted on  
238 cells transfected with NSP1<sup>42</sup>. Analysis of the RNA expression from this data revealed that  
239 ectopic NSP1 expression leads to weaker but similar signatures to the ones we identified in  
240 infected cells; stronger reduction of cytosolic transcripts compared to nuclear transcripts,  
241 stronger sensitivity of nuclear encoded transcripts, and stronger reduction of translated mRNA  
242 compared to cytosolic lncRNAs (Figure S5A-C).

243 We further noticed SARS-CoV-2 infection leads to increased levels of intronic reads in many  
244 cellular transcripts (Figures 3D and 3E) indicating SARS-CoV-2 may interfere with cellular  
245 mRNA splicing, as was recently suggested<sup>24</sup>. However, massive degradation of mature cytosolic  
246 mRNAs may also generate a relative increase in intronic reads. We therefore analyzed the ratio  
247 of intronic and exonic reads relative to rRNA. Whereas relative to rRNA levels, exonic reads  
248 showed drastic reduction along SARS-CoV-2 infection, the intronic reads levels showed a more  
249 subtle change (Figure 3F). Furthermore, the increase in the ratio of intronic to exonic reads was  
250 greater in genes whose expression was reduced along infection compared to genes whose  
251 expression was induced (Figure 3G and Figure S6A), illustrating the relative increase in intronic  
252 reads is mostly independent of newly transcribed RNAs. Finally, we also detected more intronic  
253 reads in cells that exogenously expressed NSP1<sup>42</sup> (Figure S6B). Together these results indicate  
254 that the increase in intronic reads compared to exonic reads during SARS-CoV-2 infection is  
255 largely driven by accelerated degradation of mature cellular transcripts that leads to relative  
256 reduction in exonic reads. It is likely that SARS-CoV-2 also directly regulates splicing  
257 efficiency, as was recently proposed<sup>24</sup>, but this effect seems more subtle. Together these  
258 findings indicate SARS-CoV-2 infection leads to accelerated degradation of cytosolic cellular  
259 mRNAs and that this degradation significantly affects the production of cellular proteins.

260 **SARS-CoV-2 5'UTR protects viral RNA from NSP1 induced RNA degradation**

261 An important aspect of host shutoff during infection is the ability of the virus to hamper the  
262 translation of cellular transcripts while recruiting the ribosome to its own transcripts. Although it  
263 has been suggested that SARS-CoV-2 mRNAs are refractory to the translation inhibition induced  
264 by NSP1<sup>24,43</sup> our measurements indicate that SARS-CoV-2 transcripts are not preferentially  
265 translated in infected cells (Figure 1D and <sup>9</sup>), that RNA degradation plays a prominent role in  
266 remodeling the mRNA pool in infected cells and that SARS-CoV-2 dominates the mRNA pool.  
267 All SARS-CoV-2-encoded subgenomic RNAs contain a common 5' leader sequence that is  
268 added during negative-strand synthesis<sup>44</sup>. We therefore explored whether the 5'UTR sequence  
269 protects viral mRNAs from NSP1 induced degradation. We fused the viral 5'UTR sequence or a  
270 short control 5'UTR to the 5' end of a GFP reporter (Figure 4A) and transfected these constructs  
271 together with expression vectors encoding NSP1 or NSP2 (that was used as a control) into 293T  
272 cells. We found that NSP1 expression suppresses the production of the control-GFP but not of  
273 the 5'UTR-containing GFP (Figure 4B and 4C). We extracted RNA from these cells and  
274 observed that the NSP1 induced reduction in control-GFP expression was associated with 15-  
275 fold reduction in the RNA GFP levels whereas the levels of the GFP RNA with the SARS-CoV-  
276 2 5'UTR were not reduced, and were even slightly increased, by NSP1 expression (Figure 4D).  
277 The plasmid we used also contains an mCherry reporter expressed from an independent  
278 promoter. Reassuringly NSP1 also induces a reduction in both mCherry protein (Figure S7A and  
279 S7B) and RNA levels (Figure S7C) when compared to NSP2. These results indicate that the 5'  
280 UTR of viral RNAs provides them protection from NSP1 induced degradation and that this  
281 protection contributes to the ability of the virus to dominate the mRNA pool in infected cells.

## 282 **The translation efficiency of transcriptionally induced genes is impaired during infection**

283 Our results so far exemplify how SARS-CoV-2 remodels the transcript pool in infected cells. To  
284 quantitatively evaluate the role of translational control along SARS-CoV-2 infection, we  
285 calculated relative translation efficiency (TE, ratio of footprints to mRNAs for a given gene)  
286 along infection. We then centered on genes that showed the strongest change in their relative TE  
287 along infection. We clustered these genes into four clusters, based on similarity in their temporal  
288 TE profiles, which largely reflect genes whose relative TE is reduced along infection and genes  
289 whose relative TE is increased. The mRNA and footprint temporal profiles of these genes reveal  
290 a clear signature; the genes whose relative TE along infection was reduced were genes whose

291 mRNA increased during infection but did not show a corresponding increase in footprints  
292 (Figure 5A and Figure S8). These genes were enriched in immune response genes ( $FDR < 10^{-4}$ )  
293 like IRF1, IL-6 and CXCL3. Comparing changes in mRNA and TE levels of cellular genes along  
294 infection demonstrates that generally transcripts which are transcriptionally induced following  
295 infection show a reduction in their relative TE and vice versa (Figure 5B). This inability of RNA  
296 that is elevated in response to infection to reach the ribosomes, may explain why infected cells  
297 fail to launch a robust IFN response<sup>13,14</sup>. These data demonstrate that the overall capacity of  
298 infected cells to generate new proteins is severely impaired.

299

### 300 **Discussion:**

301 Many viruses developed varied and sophisticated mechanisms to repress host mRNA translation  
302 in order to block the cellular innate immune response and concomitantly allow the translation of  
303 viral mRNAs. Specifically, CoVs have evolved specialized mechanisms to hijack the host gene  
304 expression machineries, including inhibition of host protein synthesis and induction of  
305 endonucleolytic cleavage of host mRNAs<sup>23,45</sup>. In the case of SARS-CoV-2 several viral ORFs  
306 have been suggested to interfere with viral gene expression<sup>24-28,30</sup>, but what occurs during viral  
307 infection remained an open question.

308 Using unbiased measurements of translation and RNA expression along SARS-CoV-2 infection,  
309 we identified three major courses by which SARS-CoV-2 interferes with cellular gene  
310 expression in infected cells; 1. global inhibition of protein translation, 2. degradation of cytosolic  
311 cellular transcripts and 3. specific translation inhibition of newly transcribed mRNAs.

312 Disruption of cellular protein production using these three components may represent a multi-  
313 pronged mechanism that synergistically acts to suppress the host antiviral response (Figure 5C).  
314 These mechanisms may explain the molecular basis of the potent suppression of IFN response  
315 observed in animal models and in severe COVID-19 patients<sup>15,18</sup>.

316 Despite differences in protein size and mode of action, NSP1 proteins from alpha- and beta-  
317 CoVs suppress host gene expression<sup>21,22,46</sup>, making Nsp1 a central host shutoff factor of CoVs.  
318 Indeed, several studies focused on SARS-CoV-2 encoded NSP1, showing it binds to the 40S

319 ribosomal subunit, leading to reduction in mRNA translation both in vitro and in cells<sup>24–28</sup>. Still,  
320 how the virus can overcome the NSP1-mediated block of translation and how NSP1 effects come  
321 into play during infection remained unclear. We reveal here that in resemblance to what had been  
322 described for SARS-CoV NSP1, SARS-CoV-2 NSP1 induces shutdown of host protein  
323 translation by two mechanisms: first, it stalls canonical mRNA translation as was reported by  
324 others<sup>24–28,41</sup> leading to general reduction in the translation capacity of infected cells. Second,  
325 NSP1 leads to accelerated cellular mRNA degradation. SARS-CoV NSP1 induces  
326 endonucleolytic cleavage and subsequent degradation of host mRNAs and this activity depends  
327 on its binding to the 40S ribosome subunit<sup>21,47</sup>. Our results indicate a similar mechanism  
328 operates in SARS-CoV-2 infected cells as we show cytosolic RNAs, specifically ones that are  
329 being translated, are more susceptible to SARS-CoV-2-mediated degradation. several studies  
330 have shown that mRNAs with viral 5' UTR are translated more efficiently compared to control  
331 5'UTR in the presence of NSP1<sup>24,27,43</sup><sup>26</sup> but it was further demonstrated that NSP1 inhibits  
332 translation of both cellular and a viral 5' UTR-containing reporter mRNA<sup>27</sup><sup>26</sup> implying viral  
333 mRNAs do not simply evade translation inhibition in the context of the 5' UTR sequence. Our  
334 measurements from infected cells support these findings as we show viral RNA are not  
335 preferentially translated in infected cells. Instead, using a reporter, we show that the viral 5'UTR  
336 renders mRNAs refractory to RNA degradation mediated by NSP1. Together these results  
337 support a model in which NSP1 acts as a strong inhibitor of translation, tightly binding  
338 ribosomes and reducing the pool of available ribosomes that can engage in translation. At the  
339 same time ribosome bound NSP1 leads to accelerated degradation of cellular but not of viral  
340 mRNAs providing means for viral mRNA to quickly take over and dominate the mRNA pool.  
341 This accumulation of SARS-CoV-2 mRNAs explains how infected cells switch their translation  
342 towards viral mRNAs. In support of this model, we show that within 8 hours 88% of the mRNAs  
343 in infected cells is viral. Notably, interactions between SARS-CoV NSP1 and the viral 5' UTR  
344 prevent NSP1-induced RNA cleavage<sup>47</sup>, indicating that likely similar mechanisms are applied  
345 by SARS-CoV and SARS-CoV-2 viruses.

346 On top of the general translation reduction and cellular mRNA degradation which are likely  
347 mediated by NSP1, we also observed that in mRNAs that are being induced in response to  
348 infection there is no corresponding increase in footprints, indicating these newly generated

349 transcripts are less likely to engage with ribosomes. Since mRNAs that are induced in infection  
350 are enriched in cytokines and IFN induced genes, this distinctive mechanism may provide  
351 additional explanation why infected cells fail to mount an efficient anti-viral response. Although  
352 we do not know the underlying molecular mechanism, one appealing hypothesis is viral  
353 inhibition of cellular mRNA nuclear export. Since SARS-CoV-2 replicates in the cytoplasm,  
354 inhibiting the nuclear export of mRNAs can provide unique advantages as it will specifically  
355 inhibit cellular mRNA translation and more explicitly it will lead to suppression of the host's  
356 antiviral response genes which are transcriptionally induced and therefore fully depend on  
357 efficient nuclear export. ORF6 was recently shown to co-purify with host mRNA export factors  
358 <sup>48</sup> and by over expression it disrupts nucleocytoplasmic export <sup>29</sup>, providing a candidate that may  
359 explain the phenotype we observe in infection. Another possibility is that NSP16, which was  
360 recently shown to inhibit cellular RNA splicing <sup>24</sup>, is driving this phenotype as interference with  
361 splicing will prevent efficient nuclear export. Indeed, we show here that infection leads to  
362 increased levels of intronic reads in many cellular transcripts. Although our analysis reveals  
363 some of this signature is attributed to accelerated degradation of mature cellular transcripts it is  
364 likely there is also a processing and splicing defect that leads to more intronic reads and  
365 eventually aberrant export.

366 Overall, our study provides an in-depth picture of how SARS-CoV-2 efficiently interferes with  
367 cellular gene expression, leading to shutdown of host protein production using a multipronged  
368 strategy.

369

370 **Figure legends:**

371 **Figure 1:** Global reduction of translation and in cellular mRNA levels along SARS-CoV-2  
372 Infection

373 (A) Calu3 cells were left uninfected or were infected with SARS-CoV-2 (MOI=3) for 3, 5 or 8  
374 hours and harvested for RNA-seq and for Ribo-seq. (B and C) Percentage of reads that aligned  
375 to human or viral transcripts from the sum of aligned reads shown for mRNAs (B) and footprints  
376 (C) in uninfected cells and in cells harvested at 3, 5 and 8 hpi. (D) Cumulative TE distribution  
377 among well-expressed human (black points) and viral (colored points) genes at 3, 5 and 8 hpi.  
378 (E) Protein synthesis measurement by flow cytometry of Calu3 cells infected with SARS-CoV-2  
379 (MOI = 3) for 3, 5 and 8 hpi or an uninfected control following O-Propargyl Puromycin (OPP)  
380 incorporation and fluorescent labelling. (F) Percent of reads that aligned to the human or viral  
381 transcripts from the sum of total RNA reads in uninfected cells and in cells harvested at, 3, 5 and  
382 8 hpi. (G) Heat map presenting relative mRNA and footprints expression of well-expressed  
383 human transcripts that showed the most significant changes in their mRNA levels at 8 hpi  
384 relative to uninfected, across time points during SARS-CoV-2 infection. Shown are expression  
385 levels scaled by gene after partitioning clustering. Three main clusters are marked on the right.  
386 (H) Summary of pathway enrichment analysis of genes enriched in cluster 3 (upregulated genes).  
387 Dot size reflects the number of genes from each pathway included in the tested set, and dot color  
388 reflects the false discovery rate (FDR) of the pathway enrichment.

389

390 **Figure 2:** Changes in viral gene expression along SARS-CoV-2 and MHV infection

391 (A) Schematic presentation of the SARS-CoV-2 genome organization, the subgenomic mRNAs  
392 and the main ORFs. (B and C) RNA (B) and translation levels (C) of each of the SARS-CoV-2  
393 canonical ORFs at 3, 5 and 8 hpi. (D) Relative translation efficiency of each canonical viral ORF  
394 along infection. Genes are divided to three groups based on their physical location along the  
395 genome. (E) Schematic presentation of the MHV subgenomic mRNAs, and the main ORFs.  
396 ORFs that are not expressed in the strain that was used for ribosome profiling (MHV-A59) are

397 marked by empty rectangles. **(F and G)** RNA **(F)** and translation levels **(G)** of each of the MHV  
398 ORFs at 2.5, 5 and 8 hpi. Expression was calculated from <sup>36</sup>. **(H)** Relative translation efficiency  
399 of each canonical viral ORF along infection. Genes are divided to two groups based on their  
400 location on the genome. **(I)** Relative translation efficiency of the main ORFs (ORF7a, S and  
401 ORF3a, labeled by circle) and the out of frame ORFs (ORF7b, S.iORF and ORF3c, labeled by  
402 diamond) of the S, ORF3a and ORF7a subgenomic transcripts, respectively, along SARS-CoV-  
403 2 infection. Translation levels were calculated from ribosome densities using ORF-RATER <sup>49</sup>.

404

### 405 **Figure 3: Cytosolic cellular RNAs are degraded during SARS-CoV-2 infection**

406 **(A)** RNA level fold change of cellular RNAs at different time points after infection relative to  
407 uninfected cells. RNAs were grouped to ten bins based on their cytosol to nucleus localization  
408 ratio <sup>41</sup>. **(B)** The change in RNA levels of nuclear encoded or mitochondrial encoded RNAs at  
409 different time points after infection relative to uninfected cells. **(C)** The change in RNA  
410 expression of cytosolic lncRNAs and protein coding mRNAs at different time points after  
411 infection relative to uninfected cells. **(D)** RNA reads on exons and introns of the end of IL-32  
412 gene from uninfected cells and at 8 hpi. **(E)** Box plots presenting the ratio of intronic to exonic  
413 reads for each gene in uninfected cells and at the different time points along SARS-CoV-2  
414 infection. **(F)** The % of reads that align to exonic or intronic regions relative to rRNA abundance  
415 along SARS-CoV-2 infection. **(H)** Histograms showing the change in the ratio of intronic to  
416 exonic reads of cellular genes at 8hpi relative to uninfected cells. Genes are divided according to  
417 the three clusters shown in figure 1G (representing different expression pattern along infection).

418

### 419 **Figure 4: The viral 5' UTR protects mRNA from NSP1-mediated degradation**

420 **(A)** 293T cells were transfected with expression vectors encoding either NSP1 or NSP2 (as a  
421 control) and with a GFP reporter (GFP (-) 5'UTR) or a GFP reporter that includes the viral  
422 5'UTR (GFP (+) 5'UTR). **(B)** Microscopy images of cells co-transfected with NSP2 (top) or  
423 NSP1 (bottom) together with either GFP (-) 5'UTR or GFP (+) 5'UTR. Scale bars are 100µm.



424 (C) Flow cytometry analysis of cells co-transfected with NSP1 or NSP2 together with either GFP  
425 (-) 5'UTR or GFP (+) 5'UTR. (D) Relative GFP RNA levels from GFP (-) 5'UTR or GFP (+)  
426 5'UTR in cells expressing NSP1 or NSP2 as measured by quantitative RT-PCR. Data points  
427 show measurement of biological replicates. Shown is one representative experiment out of two  
428 performed.

429

430 **Figure 5:** The translation of induced transcripts is impaired during infection

431 (A) Heat map presenting relative TE, mRNA and footprints (FP) of human genes that showed the  
432 most significant changes in their relative TE along SARS-CoV-2 infection. Shown are relative  
433 expression ratios after partitioning clustering based on changes in relative TE values. (B) Scatter  
434 plot presenting cellular transcript levels in uninfected cells compared to 8hpi. Genes are colored  
435 based on the relative change in their TE between uninfected and 8hpi. Central cytokines and IFN  
436 stimulated genes are labeled. (C) A model of how SARS-CoV-2 suppresses host gene expression  
437 through multi-pronged approach: 1. Global translation reduction; 2. Degradation of cytosolic  
438 cellular mRNAs; 3. Specific translation inhibition of newly synthesized cellular mRNAs.

439

440

#### 441 **Acknowledgements**

442 We thank Stern-Ginossar lab members for providing valuable feedback. We thank Nevan  
443 Krogan for the SARS-CoV-2 ORFs expression plasmids, Ghil Jona and Weizmann Bacteriology  
444 and Genomic Repository Units for technical assistance, Shay Weiss for support and guidance in  
445 assays involving SARS-CoV-2. This study was supported by Miel de Botton. Work in the Stern-  
446 Ginossar lab is supported by a European Research Council starting grant (StG-2014-638142).  
447 N.S-G is an incumbent of the Skirball Career Development Chair in New Scientists and is a  
448 member of the European Molecular Biology Organization (EMBO) Young Investigator Program.  
449 The authors declare no competing interests.

## 450 **Methods**

### 451 Cells and viruses

452 Calu3 cells (ATCC HTB-55) were cultured in 6-well or 10cm plates with RPMI supplemented  
453 with 10% fetal bovine serum (FBS), MEM non-essential amino acids, 2mM L-Glutamine,  
454 100Units/ml Penicillin and 1% Na-pyruvate. Monolayers were washed once with RPMI without  
455 FBS and infected with SARS-CoV-2 virus, at a multiplicity of infection (MOI) of 3, in the  
456 presence of 20 µg per ml TPCK trypsin (Thermo scientific). Plates were incubated for 1 hour at  
457 37°C to allow viral adsorption. Then RPMI medium supplemented with 2% fetal bovine serum,  
458 MEM non-essential amino acids, L glutamine and penicillin-streptomycin-Nystatin at 37°C, 5%  
459 CO<sub>2</sub> was added to each well. SARS-CoV-2 BavPat1/2020 Ref-SKU: 026V-03883 was kindly  
460 provided by C. Drosten, Charité–Universitätsmedizin Berlin, Germany. It was propagated (5  
461 passages) and tittered on Vero E6 cells and then sequenced<sup>9</sup> before it was used. Handling and  
462 working with SARS-CoV-2 virus was conducted in a BSL3 facility in accordance with the  
463 biosafety guidelines of the Israel Institute for Biological Research. The Institutional Biosafety  
464 Committee of Weizmann Institute approved the protocol used in these studies.

465

### 466 Preparation of ribosome profiling and RNA sequencing samples

467 For RNA-seq, cells were washed with PBS and then harvested with Tri-Reagent (Sigma-  
468 Aldrich), total RNA was extracted, and poly-A selection was performed using Dynabeads  
469 mRNA DIRECT Purification Kit (Invitrogen) mRNA sample was subjected to DNaseI  
470 treatment and 3' dephosphorylation using FastAP Thermosensitive Alkaline Phosphatase  
471 (Thermo Scientific) and T4 PNK (NEB) followed by 3' adaptor ligation using T4 ligase (NEB).  
472 The ligated products used for reverse transcription with SSIII (Invitrogen) for first strand cDNA  
473 synthesis. The cDNA products were 3' ligated with a second adaptor using T4 ligase and  
474 amplified for 8 cycles in a PCR for final library products of 200-300bp. For Ribo-seq libraries,  
475 cells were treated with 100µg/mL CHX for 1 minute. Cells were then placed on ice, washed  
476 twice with PBS containing 100µg/mL CHX, scraped from 10cm plates, pelleted and lysed with

477 lysis buffer (1% triton in 20mM Tris 7.5, 150mM NaCl, 5mM MgCl<sub>2</sub>, 1mM dithiothreitol  
478 supplemented with 10 U/ml Turbo DNase and 100µg/ml cycloheximide). After lysis samples  
479 stood on ice for 2h and subsequent Ribo-seq library generation was performed as previously  
480 described<sup>50</sup>. Briefly, cell lysate was treated with RNaseI for 45min at room temperature  
481 followed by SUPERase-In quenching. Sample was loaded on sucrose solution (34% sucrose,  
482 20mM Tris 7.5, 150mM NaCl, 5mM MgCl<sub>2</sub>, 1mM dithiothreitol and 100µg/ml cycloheximide)  
483 and spun for 1h at 100K RPM using TLA-110 rotor (Beckman) at 4c. Pellet was harvested using  
484 TRI reagent and the RNA was collected using chloroform phase separation. For size selection,  
485 15uG of total RNA was loaded into 15% TBE-UREA gel for 65min, and 28-34 footprints were  
486 excised using 28 and 34 flanking RNA oligos, followed by RNA extraction and ribo-seq  
487 protocol<sup>50</sup>

488

#### 489 Sequence alignment, metagene analysis

490 Sequencing reads were aligned as previously described<sup>51</sup>. Briefly, linker  
491 (CTGTAGGCACCATCAAT) and poly-A sequences were removed and the remaining reads  
492 were aligned to the Hg19 and to the SARS-Cov-2 genome (Genebank NC\_045512.2) with 3  
493 changes to match the used strain (BetaCoV/Germany/BavPat1/2020 EPI\_ISL\_406862),  
494 241:C→T, 3037:C→T, 23403:A→G]. Alignment was performed using Bowtie v1.1.2<sup>52</sup> with  
495 maximum two mismatches per read. Reads that were not aligned to the genome were aligned to  
496 the transcriptome and to SARS-CoV-2 junctions that were recently annotated<sup>44</sup>. The aligned  
497 position on the genome was determined as the 5' position of RNA-seq reads, and for Ribo-seq  
498 reads the p-site of the ribosome was calculated according to read length using the off-set from  
499 the 5' end of the reads that was calculated from canonical cellular ORFs. The offsets used are  
500 +12 for reads that were 28-29 bp and +13 for reads that were 30-33 bp. Reads that were in  
501 different length were discarded. In all figures presenting ribosome densities data, all footprint  
502 lengths (28-33bp) are presented.

503 Junctions spanning reads were quantified using STAR 2.5.3a aligner<sup>53</sup>, with running flags as  
504 suggested by<sup>44</sup>, to overcome filtering of non-canonical junctions. Reads aligned to multiple  
505 locations were discarded<sup>44</sup>.

506 For the metagene analysis only genes with more than 10 reads were used. For each gene,  
507 normalization was done to its maximum signal and each position was normalized to the number  
508 of genes contributing to the position.

#### 509 Filtering of genes, quantification and RPKM normalization

510 For analysis of cellular genes, the genes were filtered according to the number of reads as  
511 follows. The number of reads on a gene in each replicate, from at least one of the conditions  
512 (uninfected or 8hr) had to be greater than 50 for the mRNA and greater than 25 for the FP. For  
513 heatmaps and clustering, gene filtering was done according to mRNA as described above, and  
514 genes with zero reads in any of the samples (mRNA and FP of all time points) were excluded.  
515 Histone genes were excluded. Read coverage on genes was normalized to units of RPKM in  
516 order to normalize for gene length and for sequencing depth. For analysis comparing host and  
517 viral genes, the RPKM was calculated based on the total number of reads of both the host and the  
518 virus. For analysis concentrating on cellular genes alone, the RPKM was calculated based on the  
519 total number of host reads, and the RPKM values were further scaled to keep the number of total  
520 reads equal across samples. The scale factors for RNA-seq were calculated from the ratio of the  
521 host mRNA reads to total reads, including viral, rRNA and tRNA reads. in the total RNA  
522 sequencing (without polyA selection), and the scale factors for footprints were calculated from  
523 the fraction of host reads from the total aligned ribosome profiling reads, including viral and host  
524 reads.

525 Since the viral RNAs are widely overlapping, RNA-seq RPKM levels of viral genes were  
526 computed with deconvolution as detailed here. First, values for each gene were calculated by  
527 subtracting the RPKM of an ORF from the RPKM of the ORF located just upstream of it in the  
528 genome. Then, for subgenomic RNAs, leader-body junction counts were counted based on  
529 STAR alignment number of uniquely mapped reads crossing the junction. Finally, based on the  
530 correlation between the deconvoluted RPKM and junction abundance of the subgenomic RNAs,

531 the RPKM levels of all viral RNAs was estimated. To quantify the translation levels of non-  
532 canonical viral ORFs ORF-RATER was used <sup>49</sup>.

### 533 Quantification of intronic reads

534 To avoid biases from intron read count, genes without introns, or where at least one of the  
535 introns is overlapping with an exon of another gene were excluded. In addition, genes with low  
536 number of reads (< 20 on the exons, < 2 on the introns) were ignored. The number of reads on  
537 exons and introns was normalized by the total length of the exons and introns respectively to get  
538 quantification proportional to the number of molecules. Finally, the normalized number of reads  
539 on the introns was calculated as percentage of the normalized number of reads on the exons.  
540 Statistical significance (in figure 3E) was tested using a paired t-test on the log values of the  
541 percentage (with offset of 0.1 to overcome zero values).

### 542 Comparison of cytosolic lncRNAs and mitochondrial mRNAs

543 The list of cytosolic lncRNAs is based on <sup>41</sup>. The list of 14 lncRNAs (with number of reads >=  
544 50) that were used in the analysis are given in supplementary table 2. The lncRNAs were  
545 compared to protein coding genes, and mitochondrial encoded mRNAs were compared to  
546 nuclear encoded mRNAs. Statistical significance was tested using Wilcoxon rank test on the log  
547 fold change (compared to uninfected) of the RPKM values.

### 548 Protein synthesis measurement using O-Propargyl Puromycin (OPP)

549 OPP assay (OPP, Thermo Fisher Scientific) was carried out following the manufacturer's  
550 instructions. Briefly, cells were collected following treatment with 10 $\mu$ M O-Propargyl  
551 Puromycin for 30 minutes at 37 °C. The cells were then fixed for 15 minutes in 3.7%  
552 formaldehyde, and permeabilized in 0.1% Triton X-100 for 15 minutes. OPP was then  
553 fluorescently labeled by a 30 minute incubation in Click-iT® Plus OPP reaction cocktail with  
554 Alexa Fluor®594 picolyl azide (Thermo Fisher Scientific). Cells were analyzed using BD LSRII  
555 flow cytometer.

556

557 Pathway enrichment analysis

558 Enrichment analysis of cellular pathways in specific gene clusters was done with PANTHER  
559 version 15.0, with default settings and the PANTHER pathways data set <sup>54,55</sup>.

560 Reporter assay

561 pLVX-EF1alpha-SARS-CoV-2-nsp1-2XStrep-IRES-Puro and pLVX-EF1alpha-SARS-CoV-2-  
562 nsp2-2XStrep-IRES-Puro were kindly provided by Nevan Krogan, University of California, San  
563 Francisco.

564 The viral 5'UTR was constructed based on nucleotides 4-265 of the reported sequence of SARS-  
565 CoV-2 isolate Wuhan-Hu-1 (NC\_045512.2) by sequential annealing of DNA oligonucleotides  
566 (IDT, 5'UTR oligo\_1-5 listed in the table below). The coding sequence for the first 12 amino  
567 acids (aa) of ORF1a as well as the AcGFP homology region were added to the 5'UTR by two  
568 PCR amplifications. For the 5'UTR-less control plasmid, the 12 aa region with AcGFP  
569 homology was ordered from Sigma-Aldrich as oligonucleotides. The viral 5'UTR with the 12 aa  
570 region and the 12 aa region on its own were cloned into pAcGFP1-C1 (Takara Biotech) using  
571 restriction-free cloning. The entire expression cassette from the promoter to the poly-A site was  
572 amplified and cloned into pDecko-mCherry (Addgene plasmid #78534) using restriction-free  
573 cloning. Primers for PCR amplification of fragments were ordered from Sigma-Aldrich. All  
574 primers and oligonucleotides used for cloning are listed in the table below.

| Primer        | Sequence                                                                              |
|---------------|---------------------------------------------------------------------------------------|
| 5'UTR oligo_1 | caaGGTACCaaaggtttataccttcccaggttaacaaaccaaccaacttgcgatctct<br>tgtagatctgttctctaaacgaa |
| 5'UTR oligo_2 | Tgcgtgagtgcactaagcatgcagccgagtgacagccacacagattttaagttcgttt<br>agagaacagatctacaagaga   |



|                    |                                                                   |
|--------------------|-------------------------------------------------------------------|
| pDecko cloning Rev | gaccacactccaaccccgaggggaccagtaagatacattgatgagtttgacaaac<br>cacaac |
|--------------------|-------------------------------------------------------------------|

575

576

577 293T cells were transfected using JetPEI (Polyplus-transfection) following the manufacturer's  
578 instructions. Cells were assayed 24 hours post transfection by flow cytometry on a BD Accuri C6  
579 flow cytometer and imaged on a Zeiss AxioObserver Z1 wide-field microscope using a X20  
580 objective and AxioCam 506 mono camera.

581

#### 582 Quantitative real-time PCR analysis

583 Total RNA was extracted using Tri-Reagent (Sigma) and polyA selected using the Dynabeads  
584 mRNA DIRECT purification kit (Thermo Fisher Scientific ) following the manufacturer's  
585 instructions. cDNA was prepared using qScript cDNA Synthesis Kit (Quanta Biosciences)  
586 following the manufacturer's instructions. Real time PCR was performed using the SYBR Green  
587 PCR master-mix (ABI) on the QuantStudio 12K Flex (ABI) with the following primers (forward,  
588 reverse):

589 ActinB (GTCATTCCAAATATGAGATGCGT, GCTATCACCTCCCCTGTGTG)

590 AcGFP (TGACCCTGAAGTTCATCTGC, GAAGTCGTGCTGCTTCATGT)

591 mCherry (ACCGCCAAGCTGAAGGTGAC, GACCTCAGCGTCGTAGTGGC)

592 GFP and mCherry mRNA levels were calculated relative to the human ActinB transcript.

593

594



595 **References:**

- 596 1. Zhu, N. *et al.* A novel coronavirus from patients with pneumonia in China, 2019. *N. Engl.*  
597 *J. Med.* **382**, 727–733 (2020).
- 598 2. Zhou, P. *et al.* A pneumonia outbreak associated with a new coronavirus of probable bat  
599 origin. *Nature* **579**, 270–273 (2020).
- 600 3. Sola, I., Almazán, F., Zúñiga, S. & Enjuanes, L. Continuous and Discontinuous RNA  
601 Synthesis in Coronaviruses. *Annu. Rev. Virol.* **2**, 265–288 (2015).
- 602 4. Stadler, K. *et al.* SARS — beginning to understand a new virus. *Nat. Rev. Microbiol.* **1**,  
603 209–218 (2003).
- 604 5. Snijder, E. J., Decroly, E. & Ziebuhr, J. The Nonstructural Proteins Directing Coronavirus  
605 RNA Synthesis and Processing. in *Advances in Virus Research* vol. 96 59–126 (Academic  
606 Press Inc., 2016).
- 607 6. V'kovski, P., Kratzel, A., Steiner, S., Stalder, H. & Thiel, V. Coronavirus biology and  
608 replication: implications for SARS-CoV-2. *Nat. Rev. Microbiol.* 1–16 (2020)  
609 doi:10.1038/s41579-020-00468-6.
- 610 7. Bojkova, D. *et al.* Proteomics of SARS-CoV-2-infected host cells reveals therapy targets.  
611 *Nature* **583**, 469–472 (2020).
- 612 8. Davidson, A. D. *et al.* Characterisation of the transcriptome and proteome of SARS-CoV-  
613 2 reveals a cell passage induced in-frame deletion of the furin-like cleavage site from the  
614 spike glycoprotein. *Genome Med.* **12**, 68 (2020).
- 615 9. Finkel, Y. *et al.* The coding capacity of SARS-CoV-2. *Nature* 1–6 (2020)  
616 doi:10.1038/s41586-020-2739-1.
- 617 10. Stern-Ginossar, N., Thompson, S. R., Mathews, M. B. & Mohr, I. Translational control in  
618 virus-infected cells. *Cold Spring Harb. Perspect. Biol.* **11**, a033001 (2019).

- 619 11. Streicher, F. & Jouvenet, N. Stimulation of Innate Immunity by Host and Viral RNAs.  
620 *Trends in Immunology* vol. 40 1134–1148 (2019).
- 621 12. Schoggins, J. W. Interferon-Stimulated Genes: What Do They All Do? *Annu. Rev. Virol.*  
622 **6**, 567–584 (2019).
- 623 13. Ribero, M. S., Jouvenet, N., Dreux, M. & Nisole, S. Interplay between SARS-CoV-2 and  
624 the type I interferon response. *PLoS Pathogens* vol. 16 e1008737 (2020).
- 625 14. Meffre, E. & Iwasaki, A. Interferon deficiency can lead to severe COVID. *Nature* (2020)  
626 doi:10.1038/d41586-020-03070-1.
- 627 15. Hadjadj, J. *et al.* Impaired type I interferon activity and inflammatory responses in severe  
628 COVID-19 patients. *Science* (80-. ). **369**, 718–724 (2020).
- 629 16. Bastard, P. *et al.* Autoantibodies against type I IFNs in patients with life-threatening  
630 COVID-19. *Science* **370**, (2020).
- 631 17. Zhang, Q. *et al.* Inborn errors of type I IFN immunity in patients with life-threatening  
632 COVID-19. *Science* **370**, (2020).
- 633 18. Blanco-Melo, D. *et al.* Imbalanced Host Response to SARS-CoV-2 Drives Development  
634 of COVID-19. *Cell* **181**, 1036 (2020).
- 635 19. Wyler, E. *et al.* Bulk and single-cell gene expression profiling of SARS-CoV-2 infected  
636 human cell lines identifies molecular targets for therapeutic intervention. (2020)  
637 doi:10.1101/2020.05.05.079194.
- 638 20. Abernathy, E. & Glaunsinger, B. Emerging roles for RNA degradation in viral replication  
639 and antiviral defense. *Virology* **479–480**, 600–608 (2015).
- 640 21. Kamitani, W., Huang, C., Narayanan, K., Lokugamage, K. G. & Makino, S. A two-  
641 pronged strategy to suppress host protein synthesis by SARS coronavirus Nsp1 protein.  
642 *Nat. Struct. Mol. Biol.* **16**, 1134–1140 (2009).

- 643 22. Lokugamage, K. G. *et al.* Middle East Respiratory Syndrome Coronavirus nsp1 Inhibits  
644 Host Gene Expression by Selectively Targeting mRNAs Transcribed in the Nucleus while  
645 Sparing mRNAs of Cytoplasmic Origin. *J. Virol.* **89**, 10970–10981 (2015).
- 646 23. Nakagawa, K., Lokugamage, K. G. & Makino, S. Viral and Cellular mRNA Translation in  
647 Coronavirus-Infected Cells. in *Advances in Virus Research* vol. 96 165–192 (Academic  
648 Press Inc., 2016).
- 649 24. Banerjee, A. K. *et al.* SARS-CoV-2 Disrupts Splicing, Translation, and Protein  
650 Trafficking to Suppress Host Defenses. *Cell* **183**, 1–15 (2020).
- 651 25. Thoms, M. *et al.* Structural basis for translational shutdown and immune evasion by the  
652 Nsp1 protein of SARS-CoV-2. *Science* vol. 369 <http://science.sciencemag.org/> (2020).
- 653 26. Lapointe, C. P. *et al.* Dynamic competition between SARS-CoV-2 NSP1 and mRNA on  
654 the human ribosome inhibits translation initiation. *bioRxiv* 2020.08.20.259770 (2020)  
655 doi:10.1101/2020.08.20.259770.
- 656 27. Schubert, K. *et al.* SARS-CoV-2 Nsp1 binds the ribosomal mRNA channel to inhibit  
657 translation. *Nat. Struct. Mol. Biol.* **27**, 959–966 (2020).
- 658 28. Shi, M. *et al.* SARS-CoV-2 Nsp1 suppresses host but not viral translation through a  
659 bipartite mechanism. doi:10.1101/2020.09.18.302901.
- 660 29. Addetia, A. *et al.* SARS-CoV-2 ORF6 disrupts nucleocytoplasmic transport through  
661 interactions with Running title: SARS-CoV-2 ORF6 disrupts mRNA nuclear export.  
662 *bioRxiv* 2020.08.03.234559 (2020) doi:10.1101/2020.08.03.234559.
- 663 30. Xia, H. *et al.* Evasion of Type I Interferon by SARS-CoV-2. *Cell Rep.* **33**, 108234 (2020).
- 664 31. Ingolia, N. T., Lareau, L. F. & Weissman, J. S. Ribosome profiling of mouse embryonic  
665 stem cells reveals the complexity and dynamics of mammalian proteomes. *Cell* **147**, 789–  
666 802 (2011).

- 667 32. Stern-Ginossar, N. & Ingolia, N. T. Ribosome Profiling as a Tool to Decipher Viral  
668 Complexity. *Annu. Rev. Virol.* **2**, 335–349 (2015).
- 669 33. Wolff, G. *et al.* A molecular pore spans the double membrane of the coronavirus  
670 replication organelle. *Science (80-. )*. **369**, 1395–1398 (2020).
- 671 34. Liu, J., Xu, Y., Stoleru, D. & Salic, A. Imaging protein synthesis in cells and tissues with  
672 an alkyne analog of puromycin. *Proc. Natl. Acad. Sci. U. S. A.* **109**, 413–418 (2012).
- 673 35. Del Valle, D. M. *et al.* An inflammatory cytokine signature predicts COVID-19 severity  
674 and survival. *Nat. Med.* **26**, 1636–1643 (2020).
- 675 36. Irigoyen, N. *et al.* High-Resolution Analysis of Coronavirus Gene Expression by RNA  
676 Sequencing and Ribosome Profiling. *PLoS Pathog.* **12**, 1005473 (2016).
- 677 37. Firth, A. A putative new SARS-CoV protein, 3c, encoded in an ORF overlapping ORF3a.  
678 *J. Gen. Virol.* jgv001469 (2020) doi:10.1099/jgv.0.001469.
- 679 38. Jungreis, I., Sealfon, R. & Kellis, M. Sarbecovirus comparative genomics elucidates gene  
680 content of SARS-CoV-2 and functional impact of COVID-19 pandemic mutations.  
681 *bioRxiv* 2020.06.02.130955 (2020) doi:10.1101/2020.06.02.130955.
- 682 39. Cagliani, R., Forni, D., Clerici, M. & Sironi, M. Coding potential and sequence  
683 conservation of SARS-CoV-2 and related animal viruses. *Infect. Genet. Evol.* **83**, (2020).
- 684 40. Hinnebusch, A. G. Molecular Mechanism of Scanning and Start Codon Selection in  
685 Eukaryotes. *Microbiol. Mol. Biol. Rev.* **75**, 434–467 (2011).
- 686 41. Zuckerman, B., Ron, M., Mikl, M., Segal, E. & Ulitsky, I. Gene Architecture and  
687 Sequence Composition Underpin Selective Dependency of Nuclear Export of Long RNAs  
688 on NXF1 and the TREX Complex. *Mol. Cell* **79**, 251-267.e6 (2020).
- 689 42. Rao, S. *et al.* Genes with 5' terminal oligopyrimidine tracts preferentially escape global  
690 suppression of translation by the SARS-CoV-2 NSP1 protein. *bioRxiv Prepr. Serv. Biol.*

- 691 2020.09.13.295493 (2020) doi:10.1101/2020.09.13.295493.
- 692 43. Tidu, A. *et al.* The viral protein NSP1 acts as a ribosome gatekeeper for shutting down  
693 host translation and fostering SARS-CoV-2 translation Runing title: SL1 controls NSP1  
694 for SARS-CoV-2 viral translation. *bioRxiv* 2020.10.14.339515 (2020)  
695 doi:10.1101/2020.10.14.339515.
- 696 44. Kim, D. *et al.* The architecture of SARS-CoV-2 transcriptome. *Cell* **S0092-8674**, 30406–2  
697 (2020).
- 698 45. Thiel, V. *et al.* Mechanisms and enzymes involved in SARS coronavirus genome  
699 expression. *Journal of General Virology* vol. 84 2305–2315 (2003).
- 700 46. Huang, C. *et al.* Alphacoronavirus Transmissible Gastroenteritis Virus nsp1 Protein  
701 Suppresses Protein Translation in Mammalian Cells and in Cell-Free HeLa Cell Extracts  
702 but Not in Rabbit Reticulocyte Lysate. *J. Virol.* **85**, 638–643 (2011).
- 703 47. Huang, C. *et al.* SARS coronavirus nsp1 protein induces template-dependent  
704 endonucleolytic cleavage of mRNAs: Viral mRNAs are resistant to nsp1-induced RNA  
705 cleavage. *PLoS Pathog.* **7**, e1002433 (2011).
- 706 48. Gordon, D. E. *et al.* A SARS-CoV-2 protein interaction map reveals targets for drug  
707 repurposing. *Nature* **583**, 459–468 (2020).
- 708 49. Fields, A. P. *et al.* A Regression-Based Analysis of Ribosome-Profiling Data Reveals a  
709 Conserved Complexity to Mammalian Translation. *Mol. Cell* **60**, 816–827 (2015).
- 710 50. Finkel, Y. *et al.* Comprehensive annotations of human herpesvirus 6A and 6B genomes  
711 reveal novel and conserved genomic features. *Elife* **9**, e50960 (2020).
- 712 51. Tirosh, O. *et al.* The Transcription and Translation Landscapes during Human  
713 Cytomegalovirus Infection Reveal Novel Host-Pathogen Interactions. *PLoS Pathog.* **11**,  
714 e1005288 (2015).

- 715 52. Langmead, B., Trapnell, C., Pop, M. & Salzberg, S. L. Ultrafast and memory-efficient  
716 alignment of short DNA sequences to the human genome. *Genome Biol.* **10**, R25 (2009).
- 717 53. Dobin, A. *et al.* STAR: ultrafast universal RNA-seq aligner. *Bioinformatics* **29**, 15–21  
718 (2013).
- 719 54. Mi, H. & Thomas, P. PANTHER pathway: an ontology-based pathway database coupled  
720 with data analysis tools. *Methods Mol. Biol.* **563**, 123–140 (2009).
- 721 55. Mi, H., Muruganujan, A., Ebert, D., Huang, X. & Thomas, P. D. PANTHER version 14:  
722 more genomes, a new PANTHER GO-slim and improvements in enrichment analysis  
723 tools. *Nucleic Acids Res.* **47**, 419–426 (2018).

724

Figure 1

bioRxiv preprint doi: <https://doi.org/10.1101/2020.11.25.398578>; this version posted November 25, 2020. The copyright holder for this preprint (which was not certified by peer review) is the author/funder, who has granted bioRxiv a license to display the preprint in perpetuity. It is made available under aCC-BY-NC 4.0 International license.

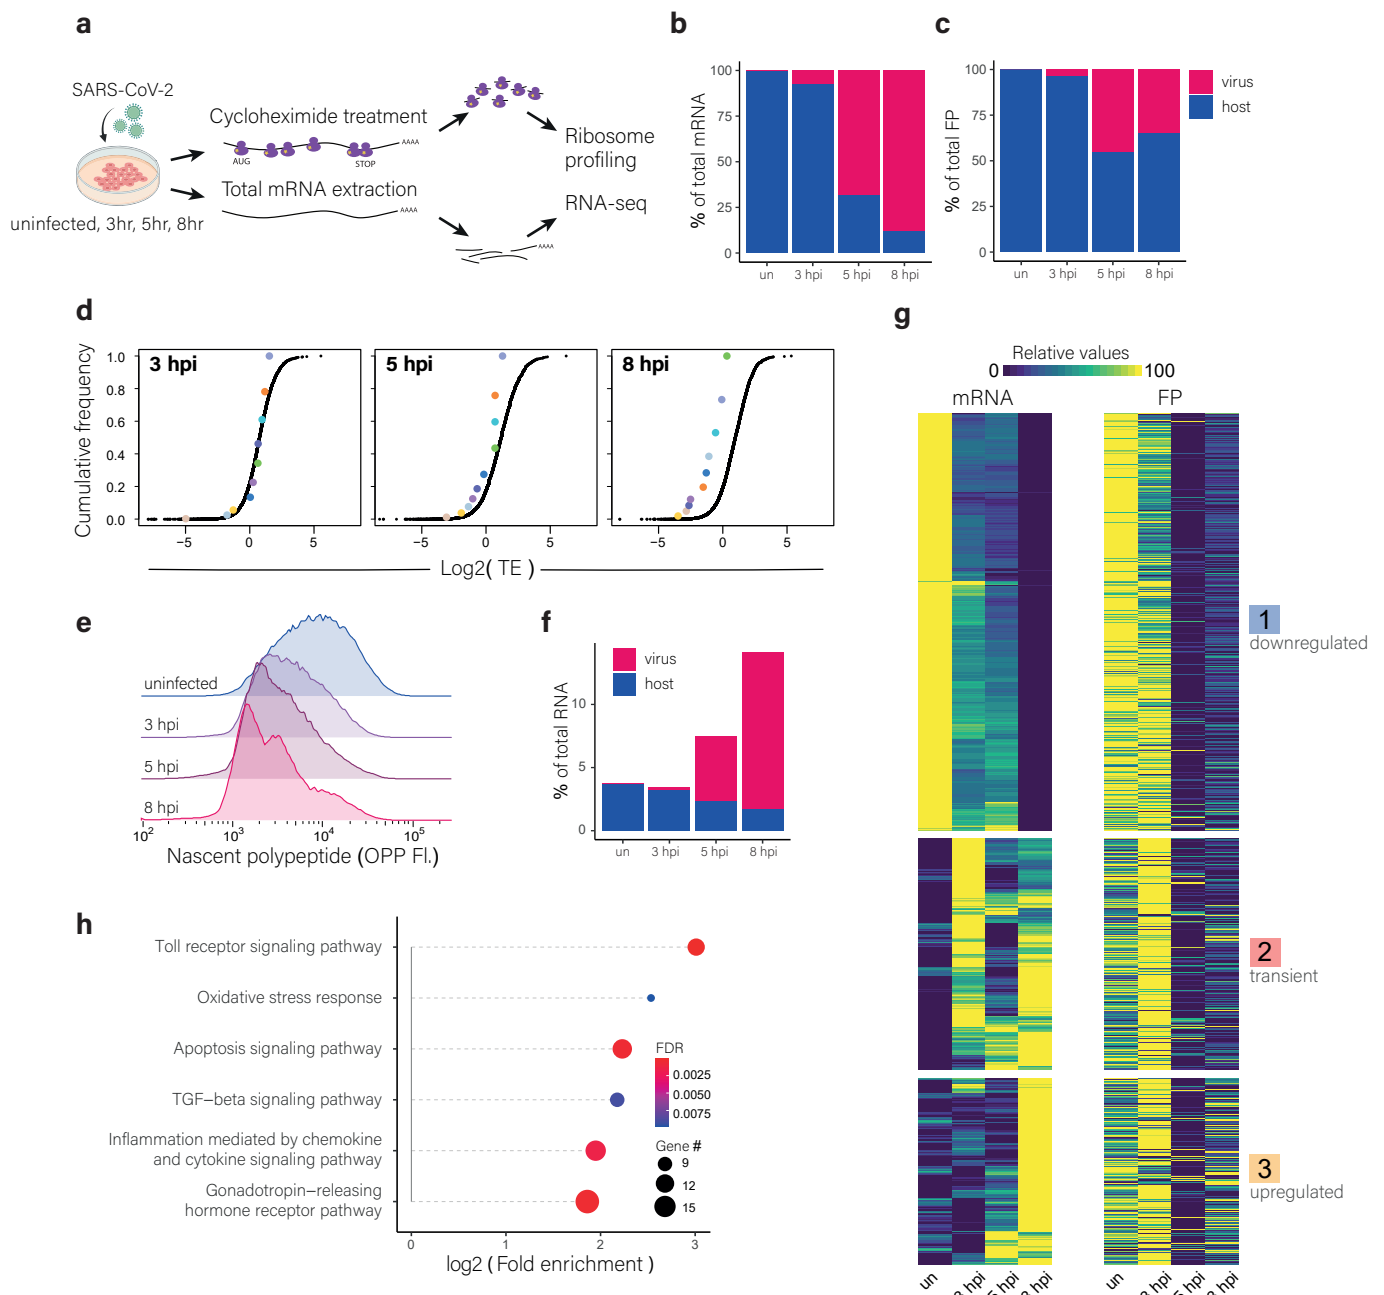

**Figure 1:** Global reduction of translation and in cellular mRNA levels along SARS-CoV-2 Infection

(A) Calu3 cells were left uninfected or were infected with SARS-CoV-2 (MOI=3) for 3, 5 or 8 hours and harvested for RNA-seq and for Ribo-seq. (B and C) Percentage of reads that aligned to human or viral transcripts from the sum of aligned reads shown for mRNAs (B) and footprints (C) in uninfected cells and in cells harvested at 3, 5 and 8 hpi. (D) Cumulative TE distribution among well-expressed human (black points) and viral (colored points) genes at 3, 5 and 8 hpi. (E) Protein synthesis measurement by flow cytometry of Calu3 cells infected with SARS-CoV-2 (MOI = 3) for 3, 5 and 8 hpi or an uninfected control following O-Propargyl Puromycin (OPP) incorporation and fluorescent labelling. (F) Percent of reads that aligned to the human or viral transcripts from the sum of total RNA reads in uninfected cells and in cells harvested at 3, 5 and 8 hpi. (G) Heat map presenting relative mRNA and footprints expression of well-expressed human transcripts that showed the most significant changes in their mRNA levels at 8 hpi relative to uninfected, across time points during SARS-CoV-2 infection. Shown are expression levels scaled by gene after partitioning clustering. Three main clusters are marked on the right. (H) Summary of pathway enrichment analysis of genes enriched in cluster 3 (upregulated genes). Dot size reflects the number of genes from each pathway included in the tested set, and dot color reflects the false discovery rate (FDR) of the pathway enrichment.

Figure 2

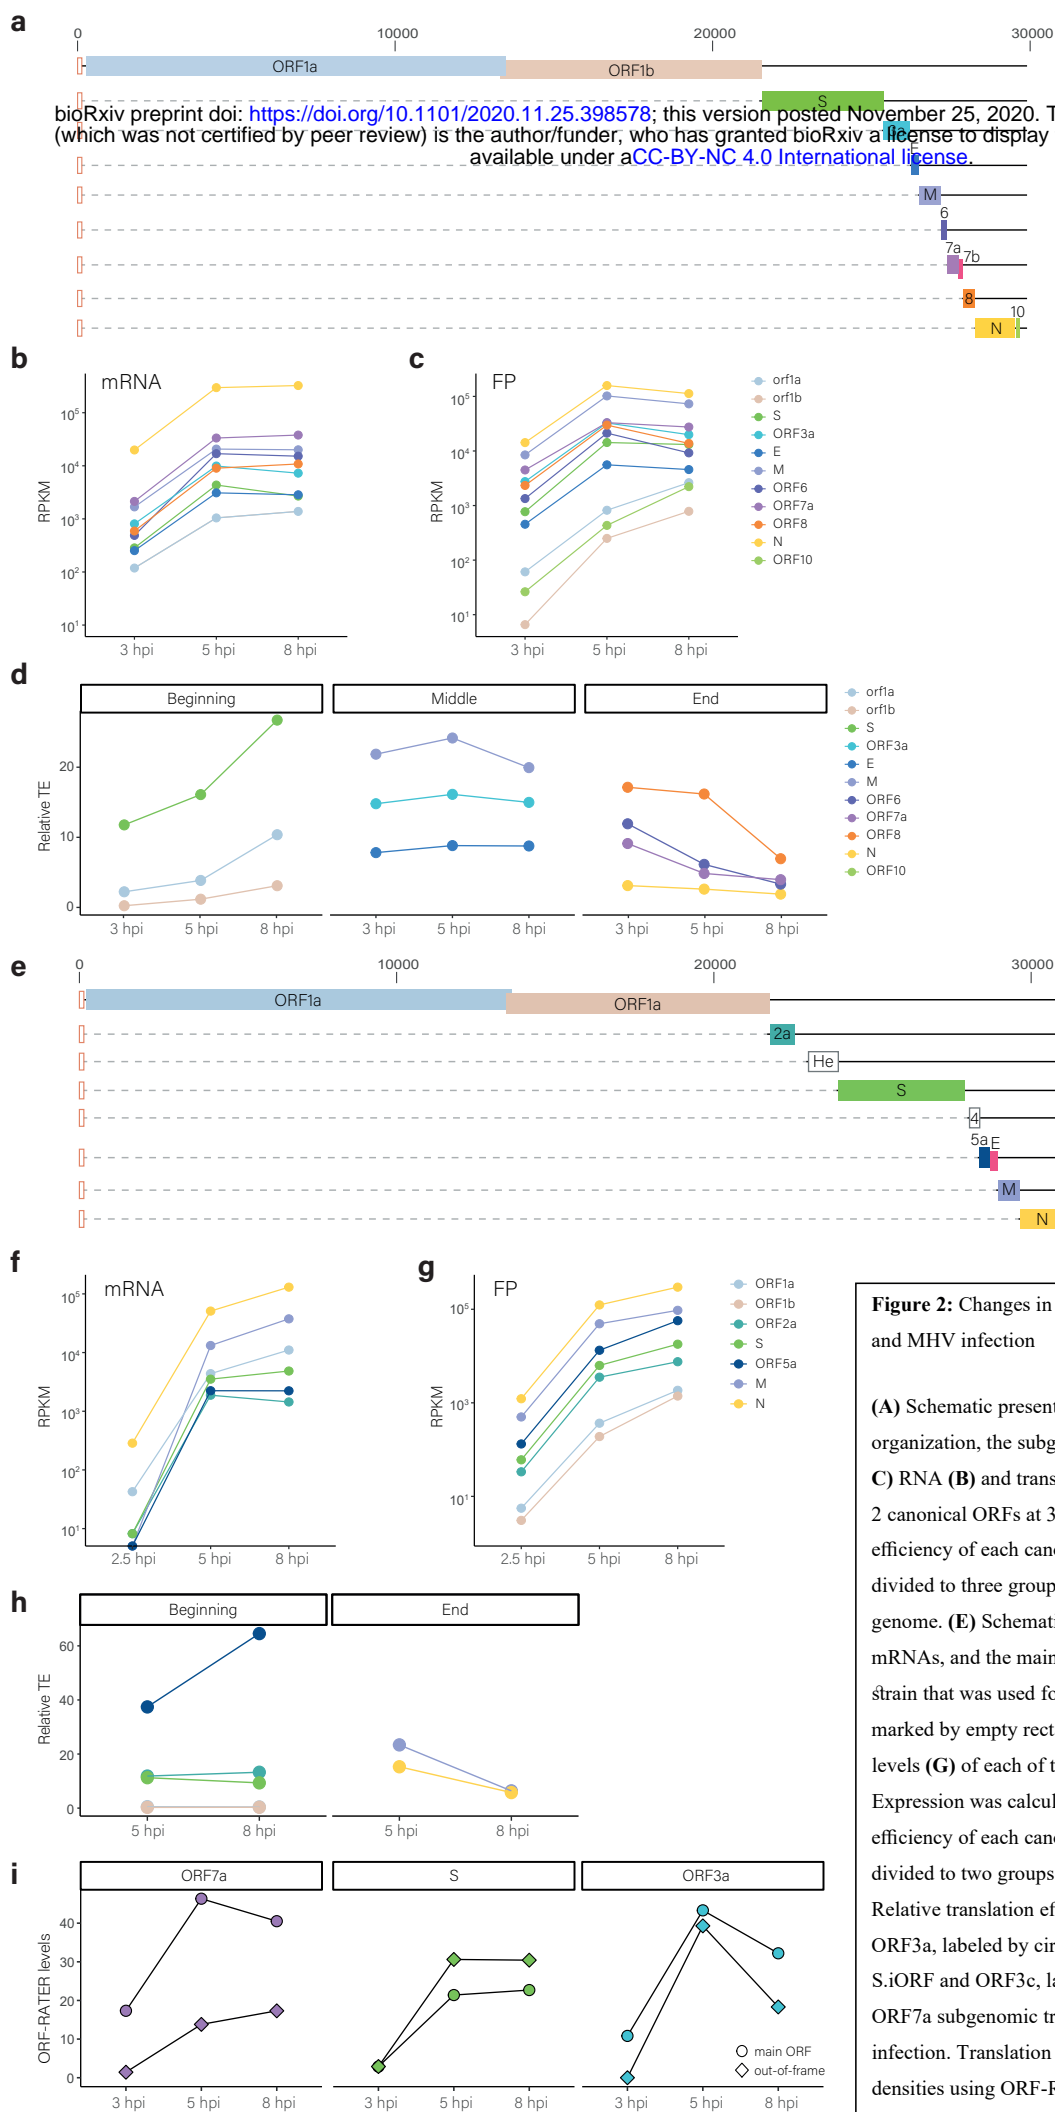

**Figure 2: Changes in viral gene expression along SARS-CoV-2 and MHV infection**

**(A)** Schematic presentation of the SARS-CoV-2 genome organization, the subgenomic mRNAs and the main ORFs. **(B and C)** RNA **(B)** and translation levels **(C)** of each of the SARS-CoV-2 canonical ORFs at 3, 5 and 8 hpi. **(D)** Relative translation efficiency of each canonical viral ORF along infection. Genes are divided to three groups based on their physical location along the genome. **(E)** Schematic presentation of the MHV subgenomic mRNAs, and the main ORFs. ORFs that are not expressed in the strain that was used for ribosome profiling (MHV-A59) are marked by empty rectangles. **(F and G)** RNA **(F)** and translation levels **(G)** of each of the MHV ORFs at 2.5, 5 and 8 hpi. Expression was calculated from <sup>36</sup>. **(H)** Relative translation efficiency of each canonical viral ORF along infection. Genes are divided to two groups based on their location on the genome. **(I)** Relative translation efficiency of the main ORFs (ORF7a, S and ORF3a, labeled by circle) and the out of frame ORFs (ORF7b, S.iORF and ORF3c, labeled by diamond) of the S, ORF3a and ORF7a subgenomic transcripts, respectively, along SARS-CoV-2 infection. Translation levels were calculated from ribosome densities using ORF-RATER <sup>49</sup>.



Figure 3

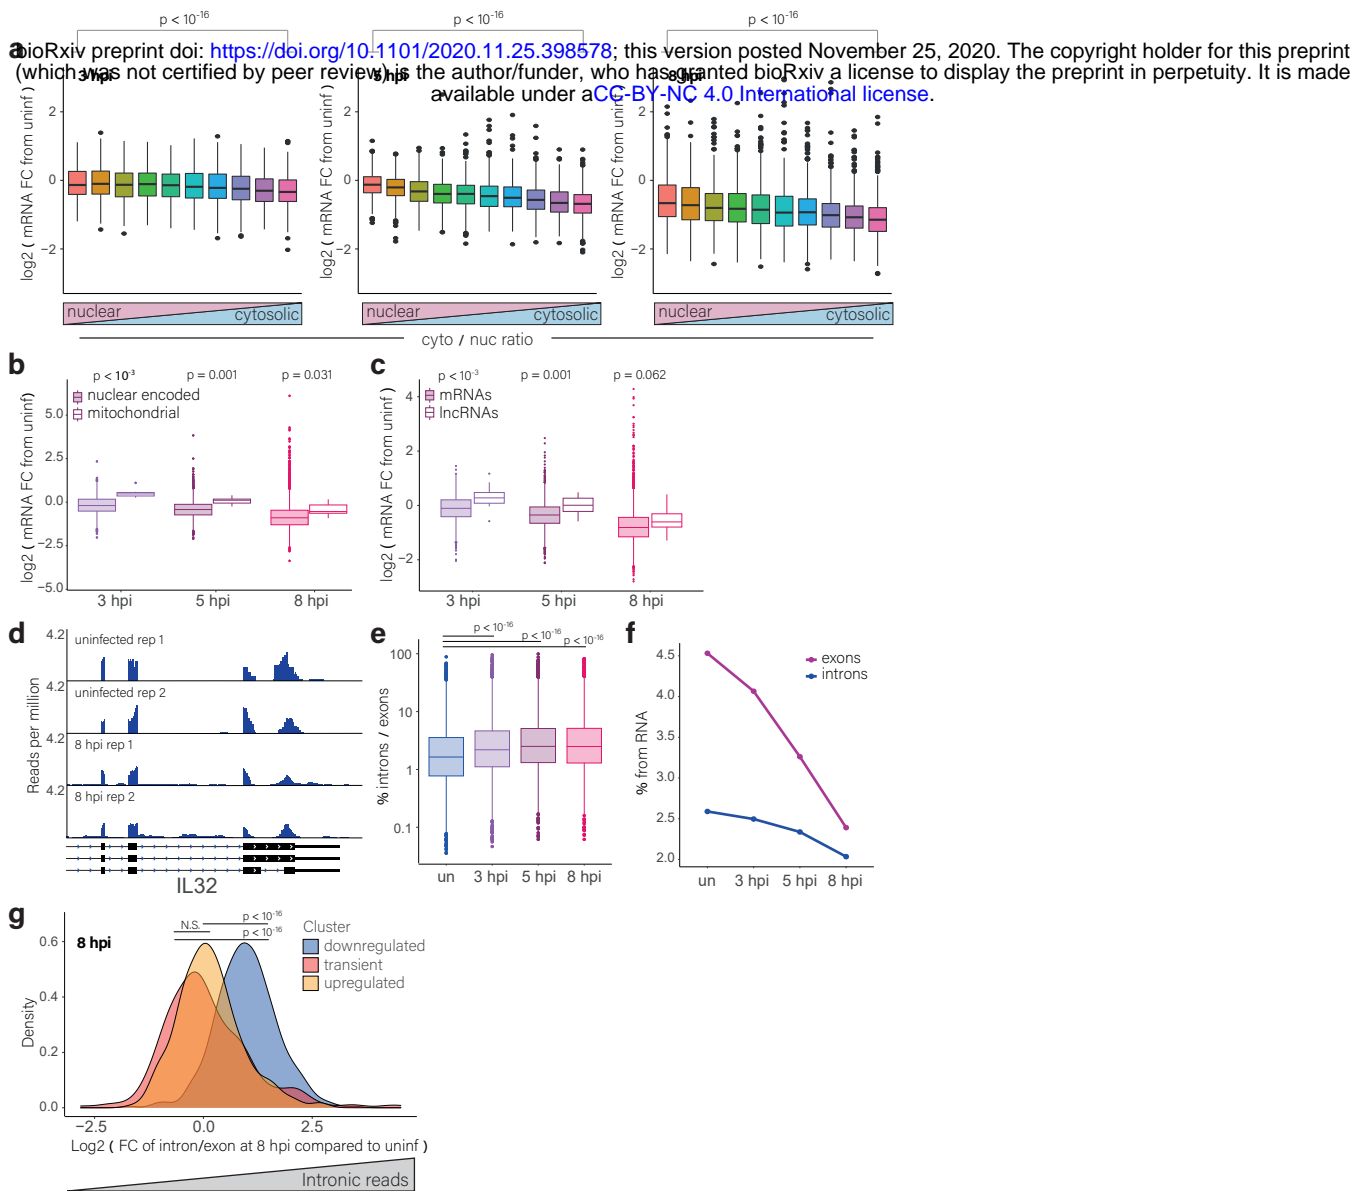

**Figure 3: Cytosolic cellular RNAs are degraded during SARS-CoV-2 infection**

**(A)** RNA level fold change of cellular RNAs at different time points after infection relative to uninfected cells. RNAs were grouped to ten bins based on their cytosol to nucleus localization ratio<sup>41</sup>. **(B)** The change in RNA levels of nuclear encoded or mitochondrial encoded RNAs at different time points after infection relative to uninfected cells. **(C)** The change in RNA expression of cytosolic lncRNAs and protein coding mRNAs at different time points after infection relative to uninfected cells. **(D)** RNA reads on exons and introns of the end of IL-32 gene from uninfected cells and at 8 hpi. **(E)** Box plots presenting the ratio of intronic to exonic reads for each gene in uninfected cells and at the different time points along SARS-CoV-2 infection. **(F)** The % of reads that align to exonic or intronic regions relative to rRNA abundance along SARS-CoV-2 infection. **(H)** Histograms showing the change in the ratio of intronic to exonic reads of cellular genes at 8hpi relative to uninfected cells. Genes are divided according to the three clusters shown in figure 1G (representing different expression pattern along infection).

Figure 4

bioRxiv preprint doi: <https://doi.org/10.1101/2020.11.25.398578>; this version posted November 25, 2020. The copyright holder for this preprint (which was not certified by peer review) is the author/funder, who has granted bioRxiv a license to display the preprint in perpetuity. It is made available under aCC-BY-NC 4.0 International license.

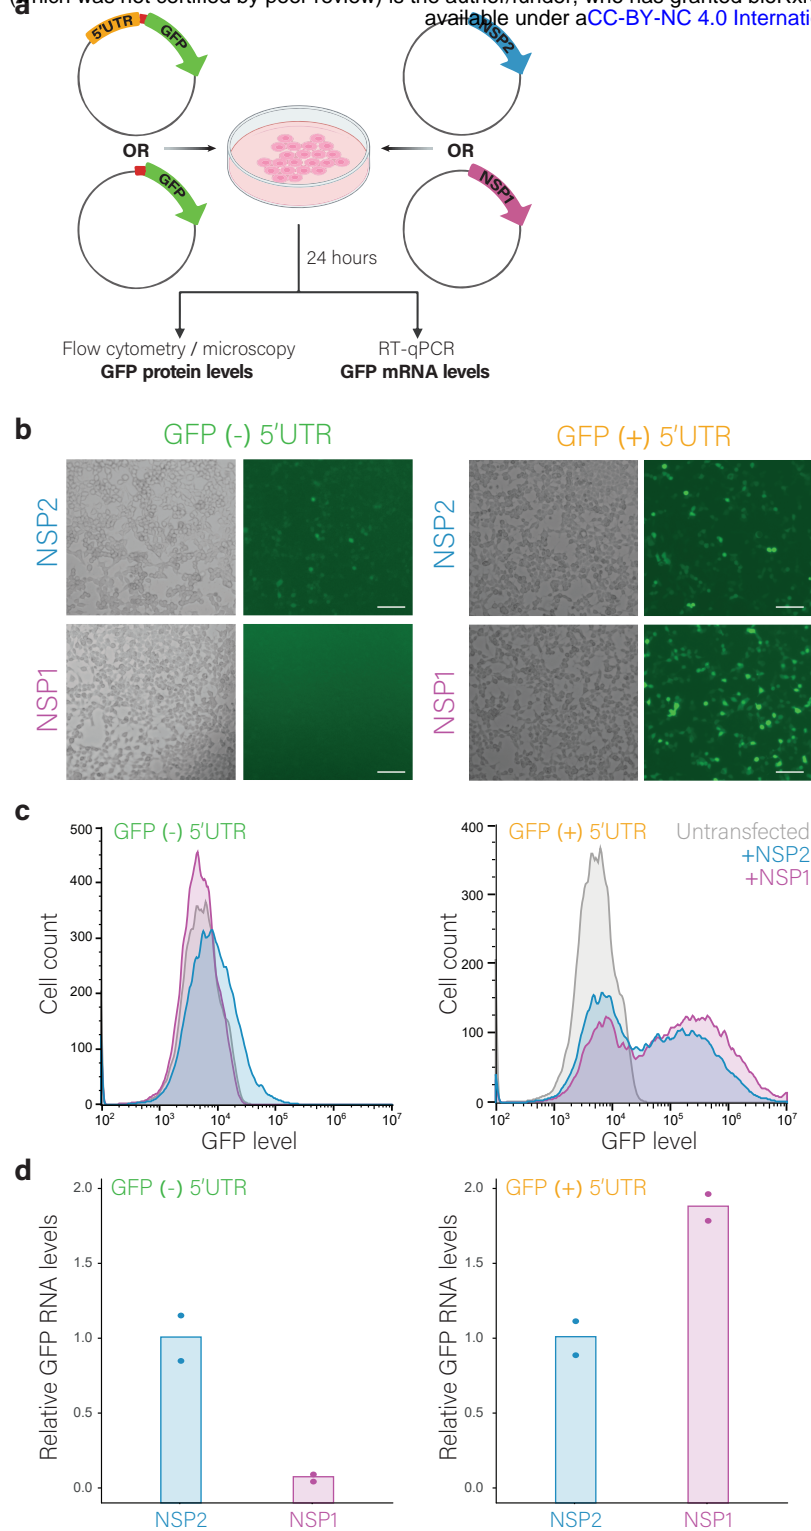

**Figure 4:** The viral 5' UTR protects mRNA from NSP1-mediated degradation

**(A)** 293T cells were transfected with expression vectors encoding either NSP1 or NSP2 (as a control) and with a GFP reporter (GFP (-) 5'UTR) or a GFP reporter that includes the viral 5'UTR (GFP (+) 5'UTR). **(B)** Microscopy images of cells co-transfected with NSP2 (top) or NSP1 (bottom) together with either GFP (-) 5'UTR or GFP (+) 5'UTR. Scale bars are 100µm. **(C)** Flow cytometry analysis of cells co-transfected with NSP1 or NSP2 together with either GFP (-) 5'UTR or GFP (+) 5'UTR. **(D)** Relative GFP RNA levels from GFP (-) 5'UTR or GFP (+) 5'UTR in cells expressing NSP1 or NSP2 as measured by quantitative RT-PCR. Data points show measurement of biological replicates. Shown is one representative experiment out of two performed.

Figure 5

bioRxiv preprint doi: <https://doi.org/10.1101/2020.11.25.398578>; this version posted November 25, 2020. The copyright holder for this preprint (which was not certified by peer review) is the author/funder, who has granted bioRxiv a license to display the preprint in perpetuity. It is made available under aCC-BY-NC 4.0 International license.

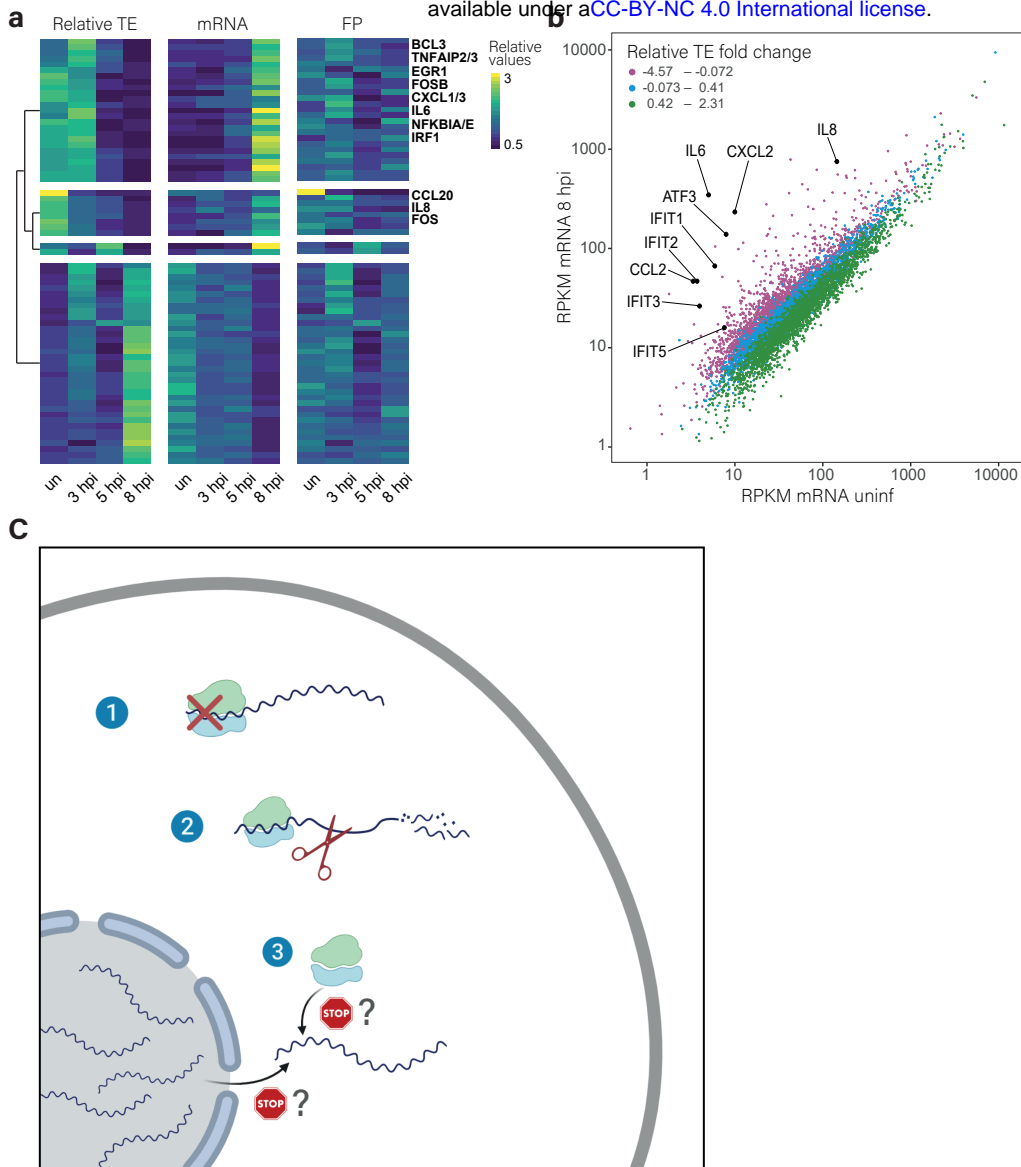

**Figure 5:** The translation of induced transcripts is impaired during infection

(A) Heat map presenting relative TE, mRNA and footprints (FP) of human genes that showed the most significant changes in their relative TE along SARS-CoV-2 infection. Shown are relative expression ratios after partitioning clustering based on changes in relative TE values. (B) Scatter plot presenting cellular transcript levels in uninfected cells compared to 8hpi. Genes are colored based on the relative change in their TE between uninfected and 8hpi. Central cytokines and IFN stimulated genes are labeled. (C) A model of how SARS-CoV-2 suppresses host gene expression through multi-pronged approach: 1. Global translation reduction; 2. Degradation of cytosolic cellular mRNAs; 3. Specific translation inhibition of newly synthesized cellular mRNAs.
